# Supplementary material for: Pulmonary surfactant protein B carried by HDL predicts incident CVD in patients with type 1 diabetes
Source: PubMed Central journal article supplement (PMC9010748; doi:10.1016/j.jlr.2022.100196), 2022-03-14
Supplement: mmc1.pdf [file mmc1.pdf]

**Supplemental Table 1. Peptides Monitored for Each Protein by PRM Analysis.**

| <b>Proteins</b>       | <b>Description</b>                         | <b>Peptides</b>    | <b>Precursor (m/z)</b> | <b>Charge State</b> | <b>RT (min)</b> |
|-----------------------|--------------------------------------------|--------------------|------------------------|---------------------|-----------------|
| A2M                   | Alpha-2-macroglobulin                      | IAQWQSFQLEGGLK     | 802.925                | 2                   | 29.8            |
| A2M                   |                                            | LLIYAVLPTGDVIGDSAK | 923.022                | 2                   | 34.0            |
| AHSG                  | Alpha-2-HS-glycoprotein                    | EHAVEGDCDFQLLK     | 554.259                | 3                   | 23.2            |
| AMBP                  | Alpha-1-Microglobulin/Bikunin Precursor    | GECVPGEQEPEPILIPR  | 960.48                 | 2                   | 27.6            |
| AMBP                  |                                            | TVAACNLPIVR        | 607.34                 | 2                   | 23.4            |
| ANTXR1                | Anthrax toxin receptor 1                   | ASEQIYYENR         | 636.796                | 2                   | 15.2            |
| ANTXR1                |                                            | DLGAIVYCVGVK       | 647.347                | 2                   | 29.8            |
| ANTXR2                | Anthrax toxin receptor 2                   | LDGLVPSYAEK        | 596.316                | 2                   | 22.2            |
| ANTXR2                |                                            | VSPVGETYIHEGLK     | 510.272                | 3                   | 21              |
| <sup>15</sup> N-APOA1 | <sup>15</sup> N-labeled Apolipoprotein A-I | DYVSQFEGSALGK      | 708.3160               | 2                   | 25.7            |
| <sup>15</sup> N-APOA1 |                                            | LHELQEK            | 454.2291               | 2                   | 12.5            |
| APOA1                 | Apolipoprotein A-I                         | DYVSQFEGSALGK      | 700.8380               | 2                   | 25.7            |
| APOA1                 |                                            | LHELQEK            | 448.7450               | 2                   | 12.5            |
| APOA2                 | Apolipoprotein A-II                        | EQLTPLIK           | 471.2870               | 2                   | 22.6            |
| APOA2                 |                                            | SPELQAEAK          | 486.7540               | 2                   | 13.2            |
| APOA4                 | Apolipoprotein A-IV                        | LAPLAEDVR          | 492.2796               | 2                   | 19.9            |

|       |                      |                      |          |   |      |
|-------|----------------------|----------------------|----------|---|------|
|       |                      |                      |          |   |      |
| APOA4 |                      | LGEVNTYAGDLQK        | 704.359  | 2 | 20   |
| APOB  | Apolipoprotein B     | TEVIPPLIENR          | 640.864  | 2 | 27.6 |
| APOB  |                      | VPSYTLILPSLELPVLHVPR | 748.444  | 3 | 34.9 |
| APOC1 | Apolipoprotein C-I   | EFGNTLEDK            | 526.7484 | 2 | 16.3 |
| APOC1 |                      | EWFSETFQK            | 601.2798 | 2 | 25.8 |
| APOC2 | Apolipoprotein C-II  | ESLSSYWESAK          | 643.799  | 2 | 23.5 |
| APOC2 |                      | TAAQNLYEK            | 519.2670 | 2 | 14   |
| APOC3 | Apolipoprotein C-III | DYWSTVK              | 449.719  | 2 | 19.2 |
| APOC3 |                      | GWVTDGFSSLK          | 598.8009 | 2 | 27.9 |
| APOC4 | Apolipoprotein C-IV  | AWFLESK              | 440.7320 | 2 | 26.0 |
| APOC4 |                      | ELLETVVNR            | 536.804  | 2 | 22.3 |
| APOD  | Apolipoprotein D     | NILTSNNIDVK          | 615.8380 | 2 | 21.8 |
| APOE  | Apolipoprotein E     | LAVYQAGAR            | 474.767  | 2 | 15.8 |
| APOE  |                      | LGPLVEQGR            | 484.78   | 2 | 18.1 |
| APOF  | Apolipoprotein F     | SGVQQLIQYYQDQK       | 849.4280 | 2 | 28.1 |
| APOF  |                      | SGVQQLIQYYQDQK       | 566.621  | 3 | 28.1 |
| APOF  |                      | SYDLDPGAGSLEI        | 668.8170 | 2 | 30.9 |

|       |                                    |                        |          |   |      |
|-------|------------------------------------|------------------------|----------|---|------|
| APOH  |                                    | ATFGCHDGYSLDGPEEIECTK  | 796.004  | 3 | 22.6 |
| APOH  |                                    | CSYTEDAQCIDGTIEVPK     | 1043.459 | 2 | 24.5 |
| APOL1 | Apolipoprotein L-I                 | LNILNNNYK              | 553.304  | 2 | 21.8 |
| APOM  | Apolipoprotein M                   | WIYHLTEGSTDLR          | 530.935  | 3 | 24.5 |
| B2M   | Beta-2-Microglobulin               | SNFLNCYVSGFHPSDIEVDLLK | 852.0810 | 3 | 33.0 |
| B2M   |                                    | VEHSDLSFSK             | 574.783  | 2 | 15.4 |
| C3    | Complement C3                      | TIYTPGSTVLYR           | 685.869  | 2 | 24.5 |
| C4BPA | C4b-binding protein alpha chain    | EDVYVVGTVLR            | 625.343  | 2 | 27.5 |
| C4BPA |                                    | FSAICQGDGTWSPR         | 791.359  | 2 | 22.6 |
| CAMP  | Cathelicidin Antimicrobial Peptide | FALLGDFFR              | 543.293  | 2 | 34.6 |
| CAMP  |                                    | SSDANLYR               | 463.2220 | 2 | 13.3 |
| CLU   | Clusterin                          | ELDESLQVAER            | 644.8230 | 2 | 19.7 |
| CST3  | Cystatin C                         | ALDFAVGEYNK            | 613.8060 | 2 | 24.5 |
| GC    | Vitamin D-binding protein          | SCESNSPPFVHPGTAECCTK   | 755.6510 | 3 | 18.5 |
| GC    |                                    | VCSQYAAAYGEK           | 638.287  | 2 | 14.5 |
| HPR   | Haptoglobin-related protein        | NYAEVGR                | 404.701  | 2 | 13.3 |
| HPR   |                                    | VGYVSGWGQSDNFK         | 772.3620 | 2 | 23.6 |
| IGF1  | Insulin-like growth factor I       | RAPQTGIVDECCFR         | 570.263  | 3 | 18.5 |

|        |                                              |                           |          |   |      |
|--------|----------------------------------------------|---------------------------|----------|---|------|
| IGF2   | Insulin-like growth factor II                | GIVECCFR                  | 585.258  | 2 | 18.8 |
| IGF2   |                                              | SCDLALLETYCATPAK          | 906.929  | 2 | 28.2 |
| IHH    | Indian hedgehog protein                      | AFQVIETQDPPR              | 700.862  | 2 | 21.6 |
| IHH    |                                              | ATFASHVQPGQYVLVAGVPGQLPAR | 855.131  | 3 | 30.7 |
| ITGB1  | Integrin beta-1                              | IGFGSFVEK                 | 492.264  | 2 | 26.2 |
| ITIH4  | Inter-alpha-trypsin inhibitor heavy chain H4 | ILDDLSPR                  | 464.759  | 2 | 20.4 |
| ITIH4  |                                              | IPKPEASFSPR               | 410.228  | 2 | 17.1 |
| LCAT   | Lecithin:cholesterol acyltransferase         | SSGLVSNAPGVQIR            | 692.8810 | 2 | 21.6 |
| LCAT   |                                              | STELCGLWQGR               | 653.8140 | 2 | 25.3 |
| LPA    | Apolipoprotein(a)                            | GTYSTTVTGR                | 521.7620 | 2 | 13.4 |
| LPA    |                                              | NPDAVAAPYCYTR             | 749.3430 | 2 | 19.0 |
| MENT   | Methylated in normal thymocytes protein      | SSAINEEDGSSEEGVVINAGK     | 1046.488 | 2 | 19.6 |
| MENT   |                                              | VGALSQR                   | 422.256  | 2 | 17.7 |
| ORM1   | Alpha-1-acid glycoprotein 1                  | EQLGEFYEALDCLR            | 871.906  | 2 | 32.2 |
| ORM2   | Alpha-1-acid glycoprotein 2                  | EQLGEFYEALDCLCIPR         | 1056.99  | 2 | 34.2 |
| PCYOX1 | Preylcysteine oxidase 1                      | TLLETLQK                  | 473.284  | 2 | 22.1 |
| PLA2G7 | Platelet-activating factor acetylhydrolase   | GSVHQNFADFTFATGK          | 576.278  | 3 | 25.5 |
| PLTP   | Phospholipid transfer protein                | ATYFGSIVLLSPAVIDSPLK      | 1046.09  | 2 | 35.0 |

|          |                                           |                        |          |   |      |
|----------|-------------------------------------------|------------------------|----------|---|------|
| PLTP     |                                           | AVEPQLQEEER            | 664.328  | 2 | 15.7 |
| PON1     | Paraoxonase/arylesterase 1                | IQNILTEEPK             | 592.8300 | 2 | 21.3 |
| PON1     |                                           | SFNPNSPGK              | 474.233  | 2 | 13.3 |
| RBP4     | Retinol Binding Protein 4                 | YWGVASFLQK             | 599.8160 | 2 | 31.3 |
| SAA1     | Serum Amyloid A1                          | FFGHGAEDSLADQAANEWGR   | 726.6590 | 3 | 25.6 |
| SCGB3A1  | Secretoglobin family 3A member 1          | CVAELGPQAVGAVK         | 699.874  | 2 | 22.0 |
| SCGB3A1  |                                           | LLLSSLGIPVNHLIEGSQK    | 1009.586 | 2 | 32.5 |
| SCGB3A1  |                                           | LLLSSLGIPVNHLIEGSQK    | 673.393  | 3 | 32.5 |
| SELL     | L-selectin                                | SYWIGIR                | 529.277  | 2 | 28.9 |
| SERPINA1 | Alpha-1-antitrypsin                       | LSITGTYDLK             | 555.8060 | 2 | 23.8 |
| SERPINA1 |                                           | SVLGQLGITK             | 508.3110 | 2 | 26.2 |
| SFTPBB   | Pulmonary surfactant-associated protein B | SPTGEWLPR              | 521.769  | 2 | 22.0 |
| SFTPBB   |                                           | YSVILLDTLLGR           | 681.903  | 2 | 34.9 |
| TTY      | Transthyretin                             | AADDTWEPFASGK          | 697.8148 | 2 | 24.5 |
| TTY      |                                           | TSESGELHGLTTEEEFVEGIYK | 819.055  | 3 | 30.0 |
| VTN      | Vitronectin                               | DVWGIEGPIDAAFTR        | 823.912  | 2 | 33.5 |
| VTN      |                                           | FEDGVLDPDYPR           | 711.83   | 2 | 24.5 |

**Supplemental Table 2. PRM analysis of HDL proteins in T1DM patients with or without CVD events in CACTI.**

| <b>Proteins</b> | <b>Description</b>                               | <b>Control</b> | <b>CVD</b>       | <b>P-value</b> | <b>Q-value</b> |
|-----------------|--------------------------------------------------|----------------|------------------|----------------|----------------|
| <b>SFTPB</b>    | <b>Pulmonary surfactant-associated protein B</b> | <b>1±1.57</b>  | <b>2.70±3.44</b> | <b>1.9E-05</b> | <b>0.00097</b> |
| <b>AMBP</b>     | <b>Alpha-1-Microglobulin/Bikunin Precursor</b>   | <b>1±0.87</b>  | <b>1.46±1.15</b> | <b>0.00016</b> | <b>0.0041</b>  |
| <b>IGF1</b>     | <b>Insulin-like growth factor I</b>              | <b>1±0.59</b>  | <b>0.71±0.69</b> | <b>0.00045</b> | <b>0.0077</b>  |
| <b>C4BPA</b>    | <b>C4b-binding protein alpha chain</b>           | <b>1±1.07</b>  | <b>1.23±1.02</b> | <b>0.0030</b>  | <b>0.038</b>   |
| <b>CST3</b>     | <b>Cystatin C</b>                                | <b>1±0.68</b>  | <b>1.34±0.94</b> | <b>0.0089</b>  | <b>0.091</b>   |
| APOH            | Beta-2-glycoprotein 1                            | 1±0.63         | 1.48±1.43        | 0.021          | 0.17           |
| B2M             | Beta-2-Microglobulin                             | 1±1.08         | 1.29±1.01        | 0.024          | 0.17           |
| PTGDS           | Prostaglandin-H2 D-isomerase                     | 1±2.42         | 1.88±3.49        | 0.030          | 0.18           |
| IGF2            | Insulin-like growth factor II                    | 1±0.62         | 0.86±0.72        | 0.031          | 0.18           |
| VTN             | Vitronectin                                      | 1±0.47         | 0.89±0.49        | 0.046          | 0.23           |
| ApoA4           | Apolipoprotein A-IV                              | 1±0.52         | 1.16±0.71        | 0.049          | 0.23           |
| ApoB            | Apolipoprotein B                                 | 1±0.65         | 1.16±0.74        | 0.066          | 0.28           |
| C3              | Complement C3                                    | 1±0.47         | 1.13±0.54        | 0.079          | 0.3            |
| ApoC3           | Apolipoprotein C-III                             | 1±0.54         | 1.27±1.02        | 0.082          | 0.3            |
| SAA1            | Serum Amyloid A1                                 | 1±2.11         | 1.02±1.14        | 0.11           | 0.37           |
| RBP4            | Retinol Binding Protein 4                        | 1±0.50         | 1.25±0.85        | 0.14           | 0.42           |
| ApoC2           | Apolipoprotein C-II                              | 1±0.57         | 1.14±0.70        | 0.14           | 0.42           |
| MENT            | Methylated in normal thymocytes protein          | 1±0.34         | 0.95±0.32        | 0.18           | 0.51           |
| ORM1            | Alpha-1-acid glycoprotein 1                      | 1±0.54         | 1.05±0.43        | 0.22           | 0.58           |
| ITGB1           | Integrin beta-1                                  | 1±0.55         | 0.87±0.46        | 0.24           | 0.58           |
| A2M             | Alpha-2-macroglobulin                            | 1±1.11         | 1.05±0.77        | 0.25           | 0.58           |
| APOD            | Apolipoprotein D                                 | 1±0.33         | 1.07±0.40        | 0.25           | 0.58           |

|          |                                              |        |           |      |      |
|----------|----------------------------------------------|--------|-----------|------|------|
| ANTXR2   | Anthrax toxin receptor 2                     | 1±0.38 | 1.06±0.39 | 0.30 | 0.66 |
| PON1     | Paraoxonase/arylesterase 1                   | 1±0.35 | 0.96±0.37 | 0.33 | 0.67 |
| AHSG     | Alpha-2-HS-glycoprotein                      | 1±0.35 | 0.96±0.36 | 0.36 | 0.68 |
| IHH      | Indian hedgehog protein                      | 1±0.42 | 0.95±0.40 | 0.38 | 0.68 |
| APOL1    | Apolipoprotein L-I                           | 1±0.47 | 0.94±0.48 | 0.38 | 0.68 |
| GC       | Vitamin D-binding protein                    | 1±0.42 | 0.94±0.39 | 0.39 | 0.68 |
| ApoE     | Apolipoprotein E                             | 1±0.47 | 0.95±0.53 | 0.42 | 0.68 |
| CAMP     | Cathelicidin Antimicrobial Peptide           | 1±0.40 | 1.04±0.38 | 0.43 | 0.68 |
| ApoC1    | Apolipoprotein C-I                           | 1±0.32 | 1.06±0.41 | 0.44 | 0.68 |
| SCGB3A1  | Secretoglobin family 3A member 1             | 1±0.75 | 0.98±0.48 | 0.44 | 0.68 |
| ApoA2    | Apolipoprotein A-II                          | 1±0.23 | 1.06±0.33 | 0.48 | 0.71 |
| ApoA1    | Apolipoprotein A-I                           | 1±0.30 | 1.04±0.34 | 0.49 | 0.71 |
| ApoC4    | Apolipoprotein C-IV                          | 1±0.53 | 1.06±0.56 | 0.50 | 0.71 |
| CLU      | Clusterin                                    | 1±0.43 | 0.93±0.34 | 0.54 | 0.73 |
| ORM2     | Alpha-1-acid glycoprotein 2                  | 1±0.49 | 1.00±0.63 | 0.55 | 0.73 |
| LPA      | Apolipoprotein(a)                            | 1±1.47 | 1.02±1.25 | 0.57 | 0.73 |
| PCYOX1   | Prenylcysteine oxidase 1                     | 1±0.36 | 1.03±0.41 | 0.58 | 0.73 |
| PLA2G7   | Platelet-activating factor acetylhydrolase   | 1±0.40 | 0.96±0.44 | 0.59 | 0.73 |
| PLTP     | Phospholipid transfer protein                | 1±0.45 | 0.96±0.37 | 0.61 | 0.74 |
| APOM     | Apolipoprotein M                             | 1±0.40 | 1.01±0.43 | 0.66 | 0.78 |
| ITIH4    | Inter-alpha-trypsin inhibitor heavy chain H4 | 1±0.89 | 1.09±1.23 | 0.71 | 0.82 |
| LCAT     | Lecithin:cholesterol acyltransferase         | 1±0.37 | 1.01±0.43 | 0.75 | 0.85 |
| SERPINA1 | Alpha-1-antitrypsin                          | 1±1.05 | 1.12±1.22 | 0.81 | 0.9  |
| SELL     | L-selectin                                   | 1±0.53 | 1.00±0.44 | 0.89 | 0.97 |
| TTY      | Transthyretin                                | 1±0.33 | 1.07±0.65 | 0.93 | 0.99 |

|        |                             |        |           |      |      |
|--------|-----------------------------|--------|-----------|------|------|
| ANTXR1 | Anthrax toxin receptor 1    | 1±0.43 | 0.98±0.37 | 0.95 | 0.99 |
| HPR    | Haptoglobin-related protein | 1±0.63 | 1.14±0.93 | 0.97 | 0.99 |
| ApoF   | Apolipoprotein F            | 1±0.34 | 1.01±0.35 | 0.99 | 0.99 |

The number of subjects was 181. There were 145 subjects in the cohort group (including 11 CVD subjects). HDL was isolated from serum. Following digestion of HDL with trypsin, HDL proteins were analyzed by isotope dilution targeted MS/MS with parallel reaction monitoring (PRM). The level of each HDL protein from 134 cohort subjects without CVD events was defined as 1.00. Data are means ± SDs. Because the levels of proteins in HDL are not normally distributed, P values were obtained by a Mann-Whitney non-parametric test. The proteins significantly associated with incident CVD after controlling the Benjamini-Hochberg false discovery rate at 10% (FDR adjusted P-values or Q-values < 0.10) are shown in bold.



**Supplemental Table 3. Correlations between levels of SFTPb in HDL and other HDL proteins.**

| <b>Protein</b> | <b>Correlation</b> | <b>P-value</b> |  | <b>Protein</b> | <b>Correlation</b> | <b>P-value</b> |
|----------------|--------------------|----------------|--|----------------|--------------------|----------------|
| APOC3          | 0.337              | 3.4E-06        |  | APOC4          | 0.226              | 0.0022         |
| APOM           | 0.325              | 7.9E-06        |  | CST3           | 0.224              | 0.0024         |
| SCGB3A1        | 0.325              | 8.2E-06        |  | ApoA2          | 0.222              | 0.0027         |
| IGF1           | -0.321             | 1.0E-05        |  | AMBP           | 0.218              | 0.0032         |
| C4BPA          | 0.315              | 1.6E-05        |  | SAA1           | 0.212              | 0.0043         |
| SELL           | 0.302              | 3.6E-05        |  | ANTXR2         | 0.209              | 0.0048         |
| APOD           | 0.299              | 4.3E-05        |  | PCYOX1         | 0.2                | 0.0069         |
| APOC2          | 0.263              | 0.00034        |  | HPR            | 0.198              | 0.0076         |
| RBP4           | 0.242              | 0.0010         |  | APOA4          | 0.182              | 0.014          |
| APOH           | 0.239              | 0.0012         |  | IHH            | 0.18               | 0.016          |
| APOA1          | 0.237              | 0.0013         |  | APOB           | 0.17               | 0.022          |
| APOC1          | 0.23               | 0.0018         |  | A2M            | 0.167              | 0.025          |

The number of subjects was 181. There were 145 subjects in the cohort group (including 11 CVD subjects) and additional 36 incident CVD subjects outside of the cohort group. HDL was isolated from serum. Following digestion of HDL with trypsin, HDL proteins were analyzed by isotope dilution targeted MS/MS with parallel reaction monitoring (PRM). Unadjusted Pearson correlation analysis was performed between the levels of SFTPb and all other HDL proteins. The 24 proteins that were significantly associated with SFTPb ( $P < 0.05$ ) are listed. See Supplemental Table 2 for protein names.

**Supplemental Table 4. Hazard Ratios of HDL Proteins for Incident CVD.**

| <b>Models</b> | <b>Hazards Ratio</b> | <b>95% CI</b> |             | <b>P-value</b> | <b>Q-value</b> |
|---------------|----------------------|---------------|-------------|----------------|----------------|
| <b>SFTPb</b>  | <b>2.22</b>          | <b>1.54</b>   | <b>3.19</b> | <b>1.7E-05</b> | <b>0.00088</b> |
| <b>IGF1</b>   | <b>0.57</b>          | <b>0.41</b>   | <b>0.80</b> | <b>0.0010</b>  | <b>0.026</b>   |
| <b>AMBP</b>   | <b>1.66</b>          | <b>1.19</b>   | <b>2.30</b> | <b>0.0026</b>  | <b>0.045</b>   |
| CST3          | 1.52                 | 1.11          | 2.08        | 0.0085         | 0.11           |
| APOH          | 1.66                 | 1.12          | 2.46        | 0.011          | 0.12           |
| PTGDS         | 1.48                 | 1.04          | 2.10        | 0.028          | 0.20           |
| C4BPA         | 1.38                 | 1.03          | 1.85        | 0.029          | 0.20           |
| B2M           | 1.40                 | 1.03          | 1.89        | 0.031          | 0.20           |
| APOC3         | 1.40                 | 1.00          | 1.95        | 0.048          | 0.27           |
| VTN           | 0.74                 | 0.53          | 1.03        | 0.077          | 0.39           |
| C3            | 1.32                 | 0.96          | 1.82        | 0.086          | 0.39           |
| APOB          | 1.30                 | 0.95          | 1.77        | 0.097          | 0.39           |
| APOA4         | 1.29                 | 0.95          | 1.75        | 0.10           | 0.39           |
| IGF2          | 0.79                 | 0.60          | 1.05        | 0.11           | 0.40           |
| RBP4          | 1.33                 | 0.92          | 1.93        | 0.13           | 0.43           |
| APOC2         | 1.25                 | 0.92          | 1.72        | 0.16           | 0.50           |
| SAA1          | 1.24                 | 0.91          | 1.69        | 0.17           | 0.52           |
| APOL1         | 0.80                 | 0.57          | 1.12        | 0.20           | 0.57           |
| ITGB1         | 0.83                 | 0.62          | 1.13        | 0.24           | 0.60           |
| APOA2         | 1.21                 | 0.88          | 1.66        | 0.24           | 0.60           |
| APOD          | 1.21                 | 0.88          | 1.66        | 0.25           | 0.60           |
| PLA2G7        | 0.83                 | 0.60          | 1.16        | 0.28           | 0.61           |
| ORM1          | 1.19                 | 0.86          | 1.66        | 0.30           | 0.61           |

|          |      |      |      |      |      |
|----------|------|------|------|------|------|
| ANTXR2   | 1.19 | 0.86 | 1.63 | 0.30 | 0.61 |
| PON1     | 0.85 | 0.61 | 1.18 | 0.33 | 0.65 |
| A2M      | 1.16 | 0.85 | 1.58 | 0.34 | 0.65 |
| CLU      | 0.87 | 0.63 | 1.19 | 0.38 | 0.67 |
| AHSG     | 0.86 | 0.62 | 1.20 | 0.38 | 0.67 |
| MENT     | 0.87 | 0.63 | 1.20 | 0.39 | 0.67 |
| IHH      | 0.88 | 0.65 | 1.19 | 0.41 | 0.67 |
| APOC1    | 1.14 | 0.82 | 1.59 | 0.44 | 0.68 |
| SCGB3A1  | 1.13 | 0.82 | 1.55 | 0.45 | 0.68 |
| APOA1    | 1.13 | 0.82 | 1.56 | 0.47 | 0.68 |
| HPR      | 1.12 | 0.81 | 1.57 | 0.49 | 0.68 |
| APOC4    | 1.11 | 0.81 | 1.52 | 0.51 | 0.68 |
| ORM2     | 0.90 | 0.67 | 1.22 | 0.51 | 0.68 |
| SERPINA1 | 1.11 | 0.81 | 1.52 | 0.52 | 0.68 |
| APOE     | 0.90 | 0.65 | 1.25 | 0.53 | 0.68 |
| CAMP     | 1.11 | 0.81 | 1.52 | 0.54 | 0.68 |
| SELL     | 1.09 | 0.80 | 1.50 | 0.57 | 0.71 |
| PCYOX1   | 1.09 | 0.79 | 1.51 | 0.60 | 0.72 |
| GC       | 0.93 | 0.69 | 1.24 | 0.61 | 0.72 |
| PLTP     | 0.94 | 0.69 | 1.29 | 0.71 | 0.82 |
| TTY      | 1.05 | 0.74 | 1.49 | 0.77 | 0.87 |
| LCAT     | 0.97 | 0.70 | 1.34 | 0.83 | 0.91 |
| ANTXR1   | 0.97 | 0.70 | 1.33 | 0.84 | 0.91 |
| APOM     | 1.03 | 0.74 | 1.42 | 0.87 | 0.91 |
| APOF     | 1.03 | 0.74 | 1.42 | 0.88 | 0.91 |

|       |      |      |      |      |      |
|-------|------|------|------|------|------|
| ITIH4 | 0.98 | 0.70 | 1.37 | 0.90 | 0.92 |
| LPA   | 1.01 | 0.73 | 1.40 | 0.96 | 0.96 |

Unadjusted hazard ratios, 95% confidence interval (CI) and P values are from Cox proportional hazard ratio models using a case-cohort design and the “cch” function in R with the default Prentice weighting. The total number of subjects included was 181 and there were 145 randomly selected subjects in the cohort. There were 47 subjects with CVD events and the cohort contained 11 incident CVD subjects. Hazard ratios are per SD increase of levels of HDL proteins. Proteins significantly associated with incident CVD after controlling the Benjamini-Hochberg false discovery rate at 10% (FDR adjusted P-values or Q-values < 0.1) are shown in bold. See Supplemental Table 2 for protein names.
